# Supplementary material for: The dual targeting of insulin and insulin-like growth factor 1 receptor enhances the mTOR inhibitor-mediated antitumor efficacy in hepatocellular carcinoma
Source: PubMed Central journal article supplement (PMC4891079; doi:10.18632/oncotarget.6836), 2016-01-07
Supplement: oncotarget-07-09718-s001.pdf [file oncotarget-07-09718-s001.pdf]

SUPPLEMENTARY FIGURES AND TABLES

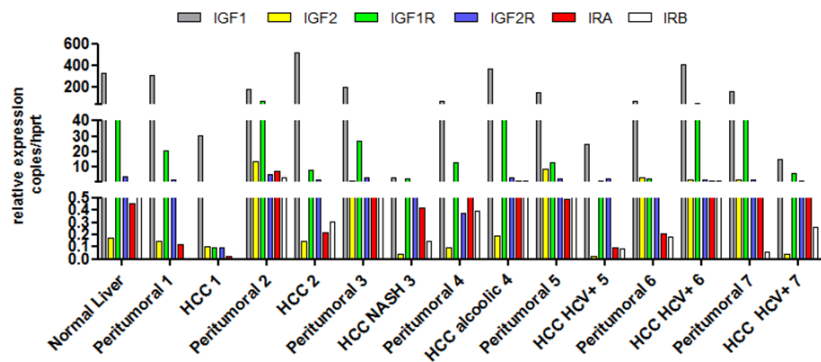

Supplementary Figure S1: mRNA relative expression of components of the IGF pathway in normal liver, HCCs and their peritumoral tissues.

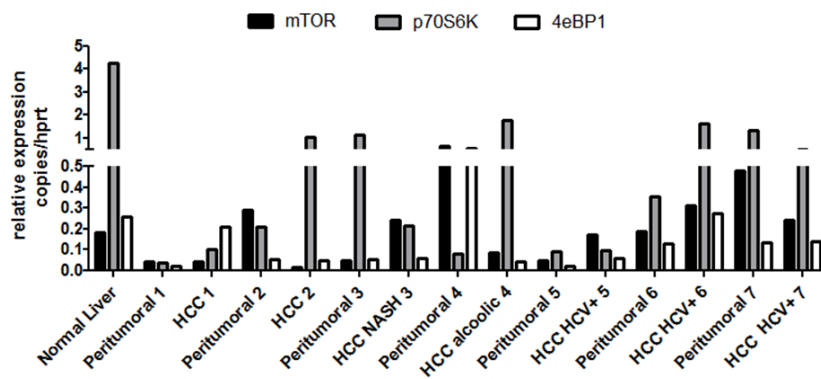

Supplementary Figure S2: mRNA relative expression of components of the mTOR pathway in normal liver, HCCs and their peritumoral tissues.

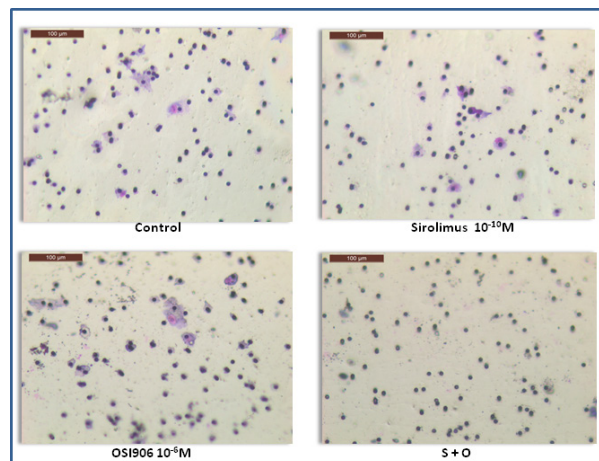

Supplementary Figure S3: Effects of Sirolimus and OSI-906, alone and in combination, on cell invasion after 24 hrs of treatment in HepG2 cell line. Since both drugs were diluted in DMSO, a double amount of DMSO was added to the control wells and the cells treated with the single agents were supplemented with an extra amount of DMSO.

Supplementary Table S1: Messenger levels of mTOR and IGF pathway components normalized against the expression of the housekeeping gene HPRT

|         | HepG2 |        | HUH-7 |        | p    |
|---------|-------|--------|-------|--------|------|
|         | mean  | ±S.E.M | mean  | ±S.E.M |      |
| IGF1    | N.D.  |        | N.D.  |        |      |
| IGF2    | 18,68 | 2,25   | 68,77 | 4,19   | 0,2  |
| IGF1R   | 0,03  | 0,01   | 0,57  | 0,05   | 0,4  |
| IGF2R   | 0,57  | 0,05   | 0,68  | 0,31   | 0,7  |
| IRA     | 0,15  | 0,04   | 0,25  | 0,16   | 1    |
| IRB     | 0,13  | 0,04   | 0,59  | 0,16   | 0,2  |
| mTOR    | 0,19  | 0,07   | 0,66  | 0,14   | 0,11 |
| pp70S6K | 0,13  | 0,02   | 0,27  | 0,07   | 0,11 |
| 4eBP1   | 1,57  | 0,47   | 10,06 | 3,4    | 0,02 |

Supplementary Table S2: Percentage of inhibition, with p value vs control, and IC50 after 3, 6 and 9 days of treatment with OSI-906 and mTORi in both cell lines

|       | 3 days                  |                         |              | 6 days                  |                         |              | 9 days                  |                         |              |                         |
|-------|-------------------------|-------------------------|--------------|-------------------------|-------------------------|--------------|-------------------------|-------------------------|--------------|-------------------------|
|       | Min eff (%)<br>p vs Ctr | Max eff (%)<br>p vs Ctr | IC50         | Min eff (%)<br>p vs Ctr | Max eff (%)<br>p vs Ctr | IC50         | Min eff (%)<br>p vs Ctr | Max eff (%)<br>p vs Ctr | IC50         |                         |
| HepG2 | OSI-906                 | 1,7 ns                  | 15,5 p<0,05  | 9,9*10 <sup>-9</sup> M  | 6,2 ns                  | 21,4 p<0,05  | 5,8*10 <sup>-7</sup> M  | 6,3 ns                  | 29,4 p<0,001 | 2,5*10 <sup>-7</sup> M  |
|       | Siroliimus              | 11,3 p<0,05             | 39,8 p<0,001 | 8,8*10 <sup>-12</sup> M | 20,5 p<0,01             | 83,4 p<0,001 | 1,6*10 <sup>-11</sup> M | 19,6 p<0,01             | 93,1 p<0,001 | 1,7*10 <sup>-12</sup> M |
|       | Everolimus              | 4,6 ns                  | 56,7 p<0,001 | 3,8*10 <sup>-13</sup> M | 25,7 p<0,001            | 8 p<0,001    | 2,2*10 <sup>-13</sup> M | 32,5 p<0,001            | 91,1 p<0,001 | 3,6*10 <sup>-13</sup> M |
|       | Temsirolimus            | 6,5 ns                  | 40,5 p<0,001 | 1,1*10 <sup>-12</sup> M | 6,8 ns                  | 81 p<0,001   | 1,1*10 <sup>-10</sup> M | 7,9 ns                  | 91,3 p<0,001 | 1,0*10 <sup>-11</sup> M |
| HuH-7 | OSI-906                 | 13,1 ns                 | 23,3 p<0,05  | 6,4*10 <sup>-11</sup> M | 1,7 ns                  | 9,17 ns      | 1,4*10 <sup>-6</sup> M  | 3,8 ns                  | 23,1 p<0,01  | 3,2*10 <sup>-7</sup> M  |
|       | Siroliimus              | 18,9 p<0,001            | 47,0 p<0,001 | 5,4*10 <sup>-13</sup> M | 32,6 p<0,001            | 69,2 p<0,001 | 1,9*10 <sup>-12</sup> M | 51,8 p<0,001            | 95,9 p<0,001 | 3,4*10 <sup>-13</sup> M |
|       | Everolimus              | 1,7 ns                  | 28,7 p<0,001 | 1,3*10 <sup>-12</sup> M | 7,3 ns                  | 64,9 p<0,001 | 4,1*10 <sup>-12</sup> M | 7 ns                    | 83,3 p<0,001 | 8,2*10 <sup>-13</sup> M |
|       | Temsirolimus            | 6,3 ns                  | 42,2 p<0,001 | 6,7*10 <sup>-12</sup> M | 11,7 ns                 | 70,3 p<0,001 | 1*10 <sup>-11</sup> M   | 8,9 ns                  | 95,8 p<0,001 | 4,6*10 <sup>-12</sup> M |

**Supplementary Table S3: Primers and probes for RT-qPCR.** The sequences are 5' - 3' in FAM/TAMRA. Primers-probes were used in the following concentrations: HPRT 500-500-100 nM, IRA, mTOR and 4eBP1 300-300-100, IGF1, IGF2, IGF1R, IGF2R, IRB and p70S6K 300-300-200 of forward primer, reverse primer and probe, respectively.

| Oligo Name | Forward                  | Reverse                    | Probe                        | Efficiency |
|------------|--------------------------|----------------------------|------------------------------|------------|
| IGF1R      | CCAAAACCTGAAGCCGAGAAG    | GGGTCGGTGATGTTGTAGGT       | AAGCAGGAACACCACGGCCG         | 1.85       |
| IGF2R      | ACCGACCCCTCCACGC         | CCTCCAAGGCCACCTTCAG        | AGCAGTACGACCTCTCCAGTCTGGCAAA | 1.87       |
| IGF1       | TTGTGATTTCTGAAGGTGAAGATG | CGTGGCAGAGCTGGTGAAG        | TACCTGGCGCTGTGCCTGTCTCA      | 1.98       |
| IGF2       | CCAAGTCCGAGAGGGACGT      | TTGGAAGAACTTGCCCACG        | ACCGTGCTTCGGACAACCTCCC       | 1.98       |
| IRA        | CGTTTGAGGATTACCTGCACAA   | GCCAAGGGACCTGCGTTT         | TGGTTTTCGTCCCCAGGCCATC       | 1.89       |
| IRB        | CCCAGAAAAACCTCTTCAGGC    | GGACCTGCGTTTCCGAGA         | CTGGTGCCGAGGACCCTAGGCC       | 1.91       |
| mTOR       | TGCTGCGTGTCTTCATGCAT     | GGATTGCAGCCAGTAACTTGATAG   | ACAGCCCAGGCCGCAATTGTC        | 1.91       |
| p70S6K     | TGGAAGACACTGCCTGCTTTT    | TGATCCCCTTTTGATGTAAATGC    | CTGGCAGAAATCTCCATGGCTTTGG    | 1.86       |
| 4eBP1      | GGCGGCACGCTCTTCA         | TCAGGAATTTCCGGTCATAGATG    | ACCACCCCGGAGGTACCAGGA        | 1.94       |
| HPRT       | TGCTTTCCTGGTCAGGCAGTAT   | AAATCCAACAAAGTCTGGCTTATATC | CAAGCTTGGACCTTGACCATCTTTGGA  | 1.91       |
